# Supplementary material for: GPR30-mediated non-classic estrogen pathway in mast cells participates in endometriosis pain via the production of FGF2
Source: PubMed Central journal article supplement (PMC9945179; doi:10.3389/fimmu.2023.1106771), 2023-02-08
Supplement: Table_1.pdf [file Table_1.pdf]

Table.1 Patient information of tissue sample

|                     | Endometriosis<br>(n=32) | Non endometriosis<br>(n=16) | <i>P</i> |
|---------------------|-------------------------|-----------------------------|----------|
| Age (year)          | 33.1±1.0                | 34.3±1.7                    | 0.519    |
| Pregnant            | 1.0±0.2                 | 1.3±0.4                     | 0.382    |
| Labor               | 0.5±0.1                 | 0.7±0.2                     | 0.296    |
| Abortion            | 0.5±0.1                 | 0.6±0.3                     | 0.565    |
| Menstrual cycle     |                         |                             |          |
| Proliferative phase | 21 (68.6%)              | 13 (81.2%)                  |          |
| Secretory phase     | 11 (34.4%)              | 3 (18.8%)                   |          |
| Pain symptom        |                         |                             |          |
| No Pain             | 14 (43.8%)              |                             |          |
| Pain                | 18 (56.2%)              |                             |          |

Table. 2 Patient information of peritoneal fluid sample

|                     | Endometriosis<br>(n=53) | Non endometriosis<br>(n=16) | <i>P</i> |
|---------------------|-------------------------|-----------------------------|----------|
| Age (year)          | 33.9±1.1                | 34.0±2.9                    | 0.964    |
| Pregnant            | 1.2±0.2                 | 1.5±0.3                     | 0.401    |
| Labor               | 0.6±0.1                 | 0.6±0.1                     | 0.990    |
| Abortion            | 0.5±0.1                 | 0.9±0.2                     | 0.217    |
| Menstrual cycle     |                         |                             |          |
| Proliferative phase | 36 (67.9%)              | 9 (56.3%)                   |          |
| Secretory phase     | 17 (32.1%)              | 6 (37.5%)                   |          |
| rAFS stage          |                         |                             |          |
| I                   | 12 (22.6%)              |                             |          |
| II                  | 2 (3.8%)                |                             |          |

|                      | Endometriosis<br>(n=53) | Non endometriosis<br>(n=16) | <i>P</i> |
|----------------------|-------------------------|-----------------------------|----------|
| III                  | 14 (26.4%)              |                             |          |
| IV                   | 25 (47.2%)              |                             |          |
| <b>Type</b>          |                         |                             |          |
| Peritoneal lesion    | 12 (22.6%)              |                             |          |
| Ovarian endometrioma | 24 (45.3%)              |                             |          |
| DIE                  | 17 (32.1%)              |                             |          |
| <b>Pain symptom</b>  |                         |                             |          |
| No Pain              | 20 (37.7%)              | 12 (75.0%)                  |          |
| Pain                 | 33 (62.3%)              | 4 (25.0%)                   |          |

rAFS: revised American Fertility Society; DIE: deep infiltrated endometriosis.
