# Supplementary material for: GPR30-mediated non-classic estrogen pathway in mast cells participates in endometriosis pain via the production of FGF2
Source: PubMed Central journal article supplement (PMC9945179; doi:10.3389/fimmu.2023.1106771), 2023-02-08
Supplement: Table_2.pdf [file Table_2.pdf]

**Primer sequences of quantitative real-time PCR**

| <b>Primer</b> | <b>Forward (5'-3')</b> | <b>Reverse (5'-3')</b>  |
|---------------|------------------------|-------------------------|
| GAPDH(Human)  | GGAGCGAGATCCCTCCAAAAT  | GGCTGTTGTCATACTTCTCATGG |
| C-KIT(Human)  | GCGTTCTGCTCCTACTGCTTCG | TGGATGGATGGTGGAGACGGTTC |
| TPSAB1(Human) | GTGACGCAAATACCACCTTGGC | CCATTCACCTTGCACACCAGGG  |
| FGFR1(Human)  | CCCGTAGCTCCATATTGGACA  | TTTGCCATTTTTCAACCAGCG   |
| FGFR2(Human)  | GGTGGCTGAAAAACGGGAAG   | AGATGGGACCACACTTTCCATA  |
| FGFR3(Human)  | TGCGTCGTGGAGAACAAGTTT  | GCACGGTAACGTAGGGTGTG    |
| FGFR4(Human)  | CCATAGGGACCCCTCGAATAG  | CAGCGGAACTTGACGGTGT     |
| GAPDH(Rat)    | CTCATGACCACAGTCCATGC   | TTCAGCTCTGGGATGACCTT    |
| GPR30(Rat)    | AGTTTCGGCGCTGATGGTT    | GGTCTTCTTCCTCTGCGGGTA   |
